# Supplementary material for: SOX2 Promotes the Epithelial to Mesenchymal Transition of Esophageal Squamous Cells by Modulating Slug Expression through the Activation of STAT3/HIF-α Signaling
Source: MDPI journal article supplement (doi:10.3390/ijms160921643), 2015-09-08
Supplement: s1 [file s1]

## Supplementary Information

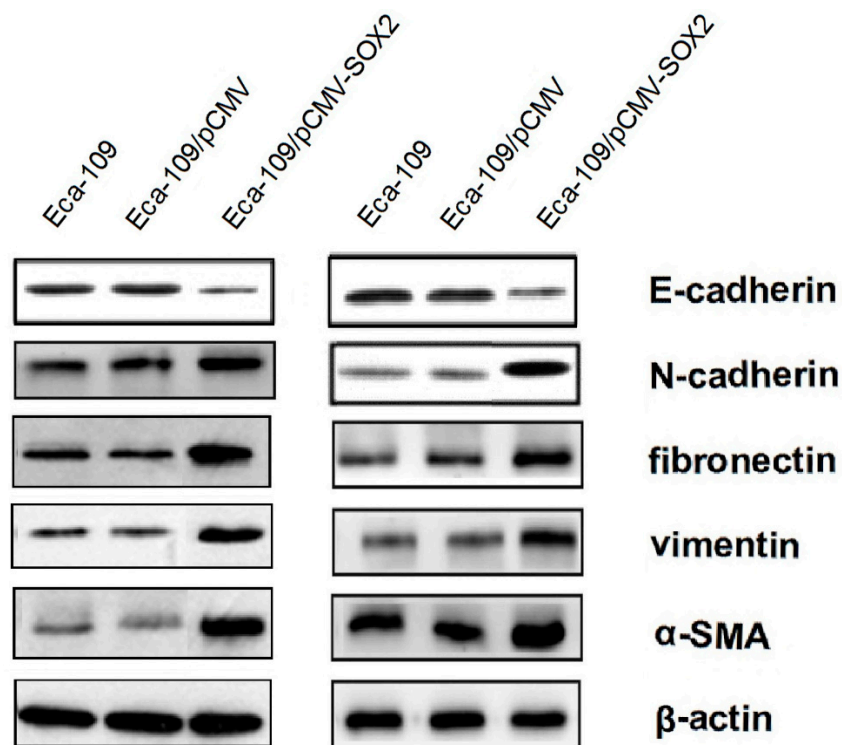

**Figure S1.** SOX2 over expression promotes the EMT process. The other two Western blot experiments showing the effect of SOX2 on the expressions of epithelial and mesenchymal cells markers (E-cadherin, N-cadherin, vimentin, fibronectin and  $\alpha$ -SMA). Supplementary to Figure 2B.

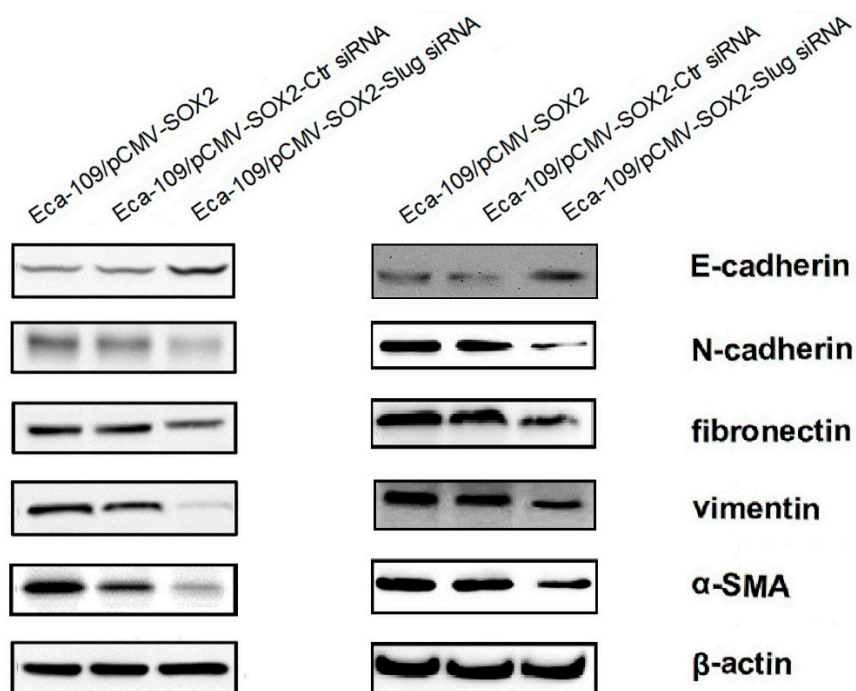

**Figure S2.** The other two Western blot experiments showing the effect of Slug knockdown on the expression of epithelial and mesenchymal markers in SOX2 overexpressing cells. Supplementary to Figure 3C.
